# Supplementary material for: Label-Free Electrochemical Aptasensor Based on the Vertically-Aligned Mesoporous Silica Films for Determination of Aflatoxin B1
Source: MDPI journal article supplement (doi:10.3390/bios13060661), 2023-06-16
Supplement: s1 [file s1]

# **Label-Free Electrochemical Aptasensor Based on the Vertically-Aligned Mesoporous Silica Films for Determination of Aflatoxin B1**

**Tongtong Zhang 1,†, Shuai Xu 2,†, Xingyu Lin 3, Jiyang Liu 2,\* and Kai Wang 1,\***

<sup>1</sup> Key Laboratory of Integrated Oncology and Intelligent Medicine of Zhejiang Province, Department of Hepatobiliary and Pancreatic Surgery, Affiliated Hangzhou First People's Hospital, Zhejiang University School of Medicine, Hangzhou 310006, China

<sup>2</sup> Key Laboratory of Surface & Interface Science of Polymer Materials of Zhejiang Province, Department of Chemistry, Zhejiang Sci-Tech University, Hangzhou 310018, China

<sup>3</sup> College of Biosystems Engineering and Food Science, Zhejiang University, Hangzhou 310058, China

\* Correspondence: liujy@zstu.edu.cn (J.L.); kaiw3@zju.edu.cn (K.W.)

† These authors contributed equally to this work.

## **Table of Contents**

**S1. Electrochemical characterization of VMSF/ITO**

**S2. Electrochemical behaviors of  $\text{Ru}(\text{NH}_3)_6^{3+}$  and  $\text{Ru}(\text{bpy})_3^{2+}$  at the bare ITO and VMSF/ITO electrodes**

**S3. Difference in half-wave width of DPV between bare ITO and VMSF/ITO**

**S4. Optimization of aptamer concentration**

**S5. Effect of rinsing procedure on the aptasensor**

**S6. Anodic peak currents and their standard deviations corresponding to different concentrations**

## S1. Electrochemical characterization of VMSF/ITO

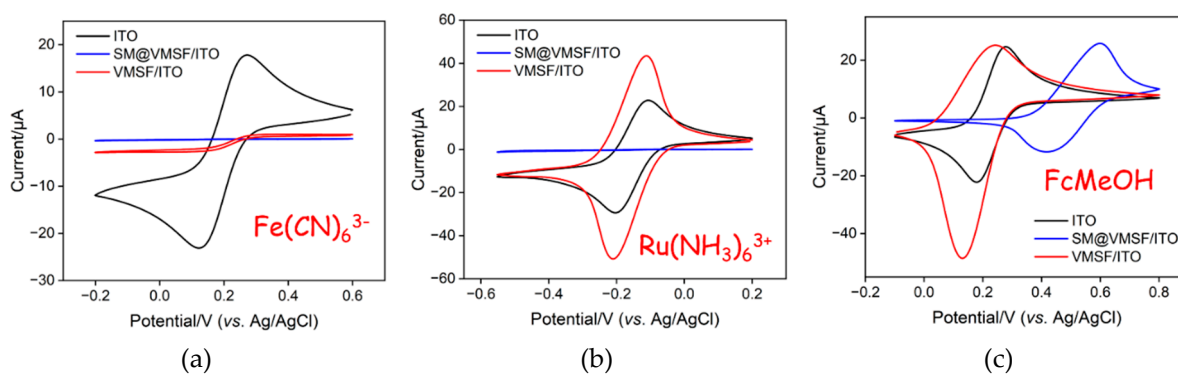

**Figure S1** (a-c) CV curves of bare ITO, SM@VMSF/ITO and VMSF/ITO electrodes in 0.05 M KHP solution (pH = 7.4) containing 0.5 mM  $\text{K}_3[\text{Fe}(\text{CN})_6]$  (a),  $[\text{Ru}(\text{NH}_3)_6]\text{Cl}_3$  (b) and  $\text{FcMeOH}$  (c), respectively.

## S2. Electrochemical behaviors of $\text{Ru}(\text{NH}_3)_6^{3+}$ and $\text{Ru}(\text{bpy})_3^{2+}$ at the bare ITO and VMSF/ITO electrodes

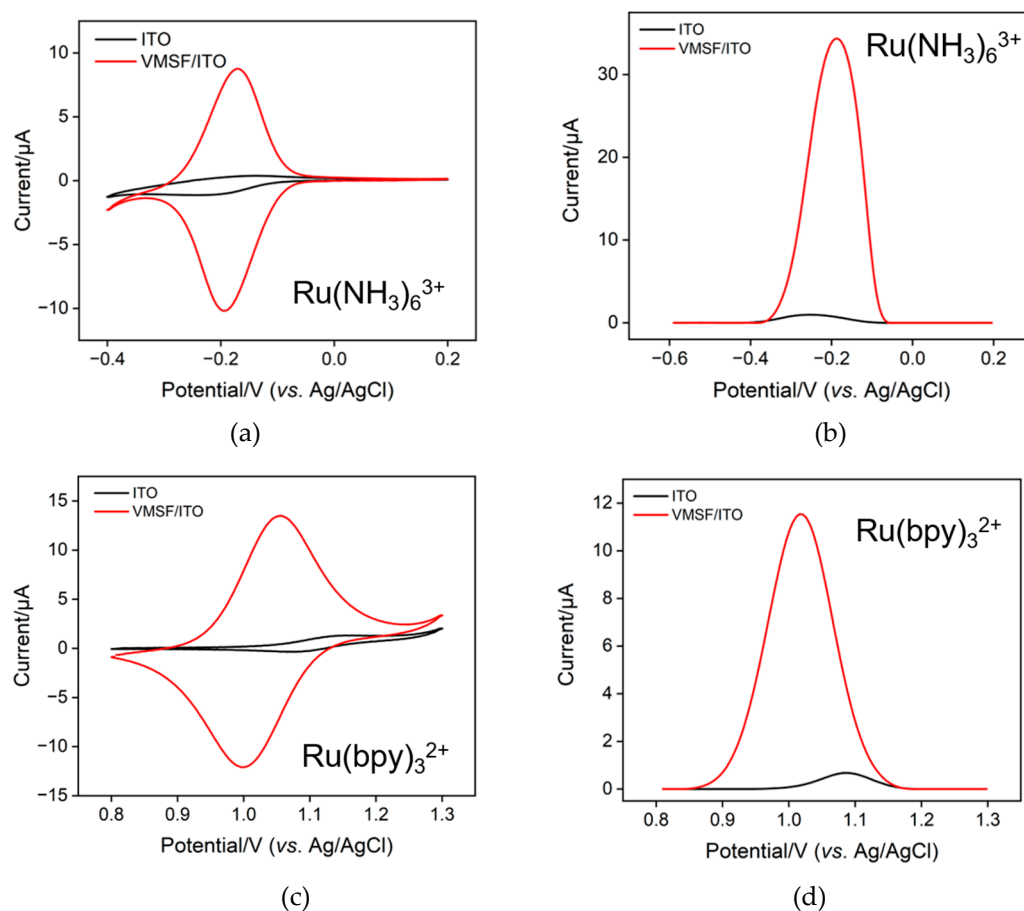

**Figure S2** CV (a, c) and DPV (b, d) curves of bare ITO (black line) and VMSF/ITO (red line) in 0.01M PBS (pH=7.4) solution containing 10  $\mu\text{M}$   $\text{Ru}(\text{NH}_3)_6^{3+}$  (a, b) and  $\text{Ru}(\text{bpy})_3^{2+}$  (c, d), respectively.

### S3. Difference in half-wave width of DPV between bare ITO and VMSF/ITO

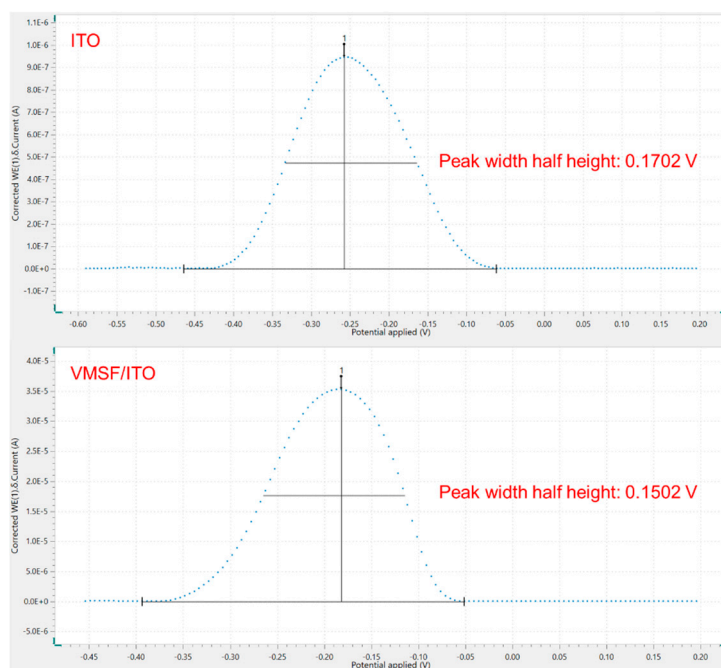

**Figure S3** DPV curves of bare ITO and VMSF/ITO electrodes in PBS (0.01M pH=7.4) solution containing 10  $\mu\text{M}$   $\text{Ru}(\text{NH}_3)_6^{3+}$ .

#### S4 Optimization of aptamer concentration

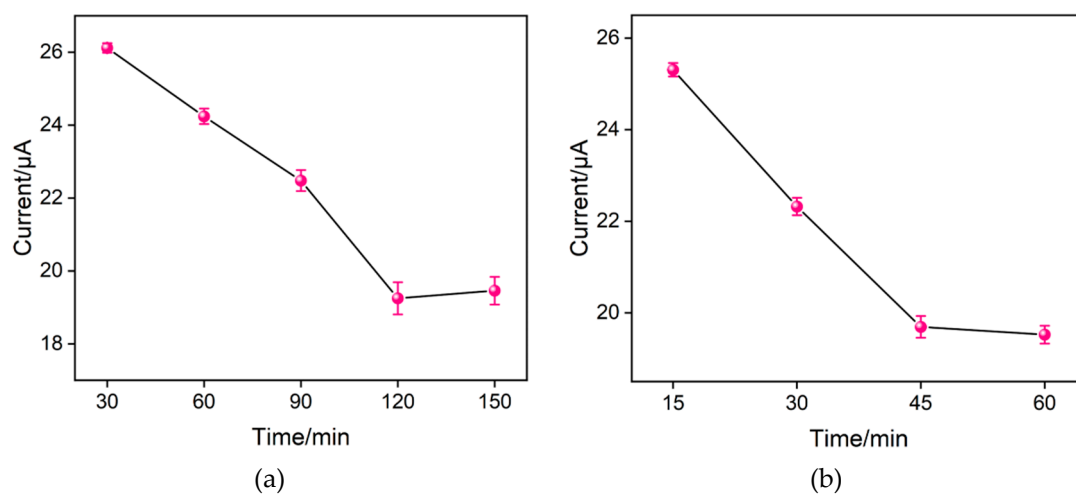

**Figure S4** Optimization of incubation time for aptamer with different concentrations: (a) 0.1  $\mu\text{M}$  and (b) 1  $\mu\text{M}$ . Error bars represent the standard deviation of three experimental measurements.

### S5. Effect of rinsing procedure on the aptasensor

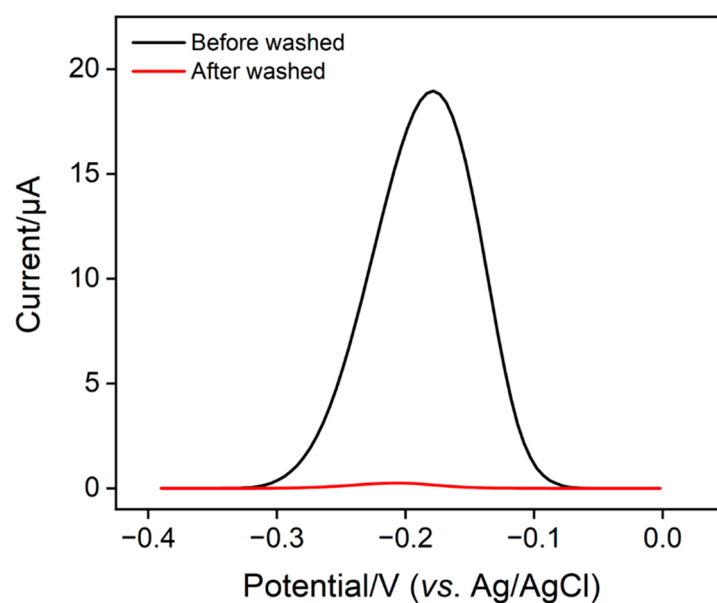

**Figure S5** DPV signals of BSA/Apt/O-VMSE/ITO aptasensor in blank PBS (0.01 M pH 7.4) after incubation with 50  $\mu\text{L}$  of extracted corn sample containing 10  $\mu\text{M}$   $\text{Ru}(\text{NH}_3)_6^{3+}$  and 100  $\mu\text{M}$   $\text{Ca}^+$ ,  $\text{Na}^+$  and  $\text{K}^+$  with or without being rinsed with distilled water.

**S6. Anodic peak currents and their standard deviations corresponding to different concentrations**

**Table S1.** Anodic peak currents and their standard deviations corresponding to different concentrations shown in Figure 5a.

| <b>Concentration (ng/mL)</b> | <b>Anodic peak current (<math>\mu\text{A}</math>)</b> | <b>Standard deviation (<math>\mu\text{A}</math>)</b> |
|------------------------------|-------------------------------------------------------|------------------------------------------------------|
| 0.003                        | 18.965                                                | 0.454                                                |
| 0.03                         | 16.921                                                | 0.180                                                |
| 0.3                          | 14.981                                                | 0.053                                                |
| 3                            | 13.163                                                | 0.504                                                |
| 30                           | 10.328                                                | 0.342                                                |
| 300                          | 7.258                                                 | 0.415                                                |
| 3000                         | 5.663                                                 | 0.265                                                |
